# Supplementary material
Source: PubMed Central journal article supplement (PMC11305122)
Supplement: NIHMS2011421-supplement-Figure_S1.pdf [file NIHMS2011421-supplement-Figure_S1.pdf]

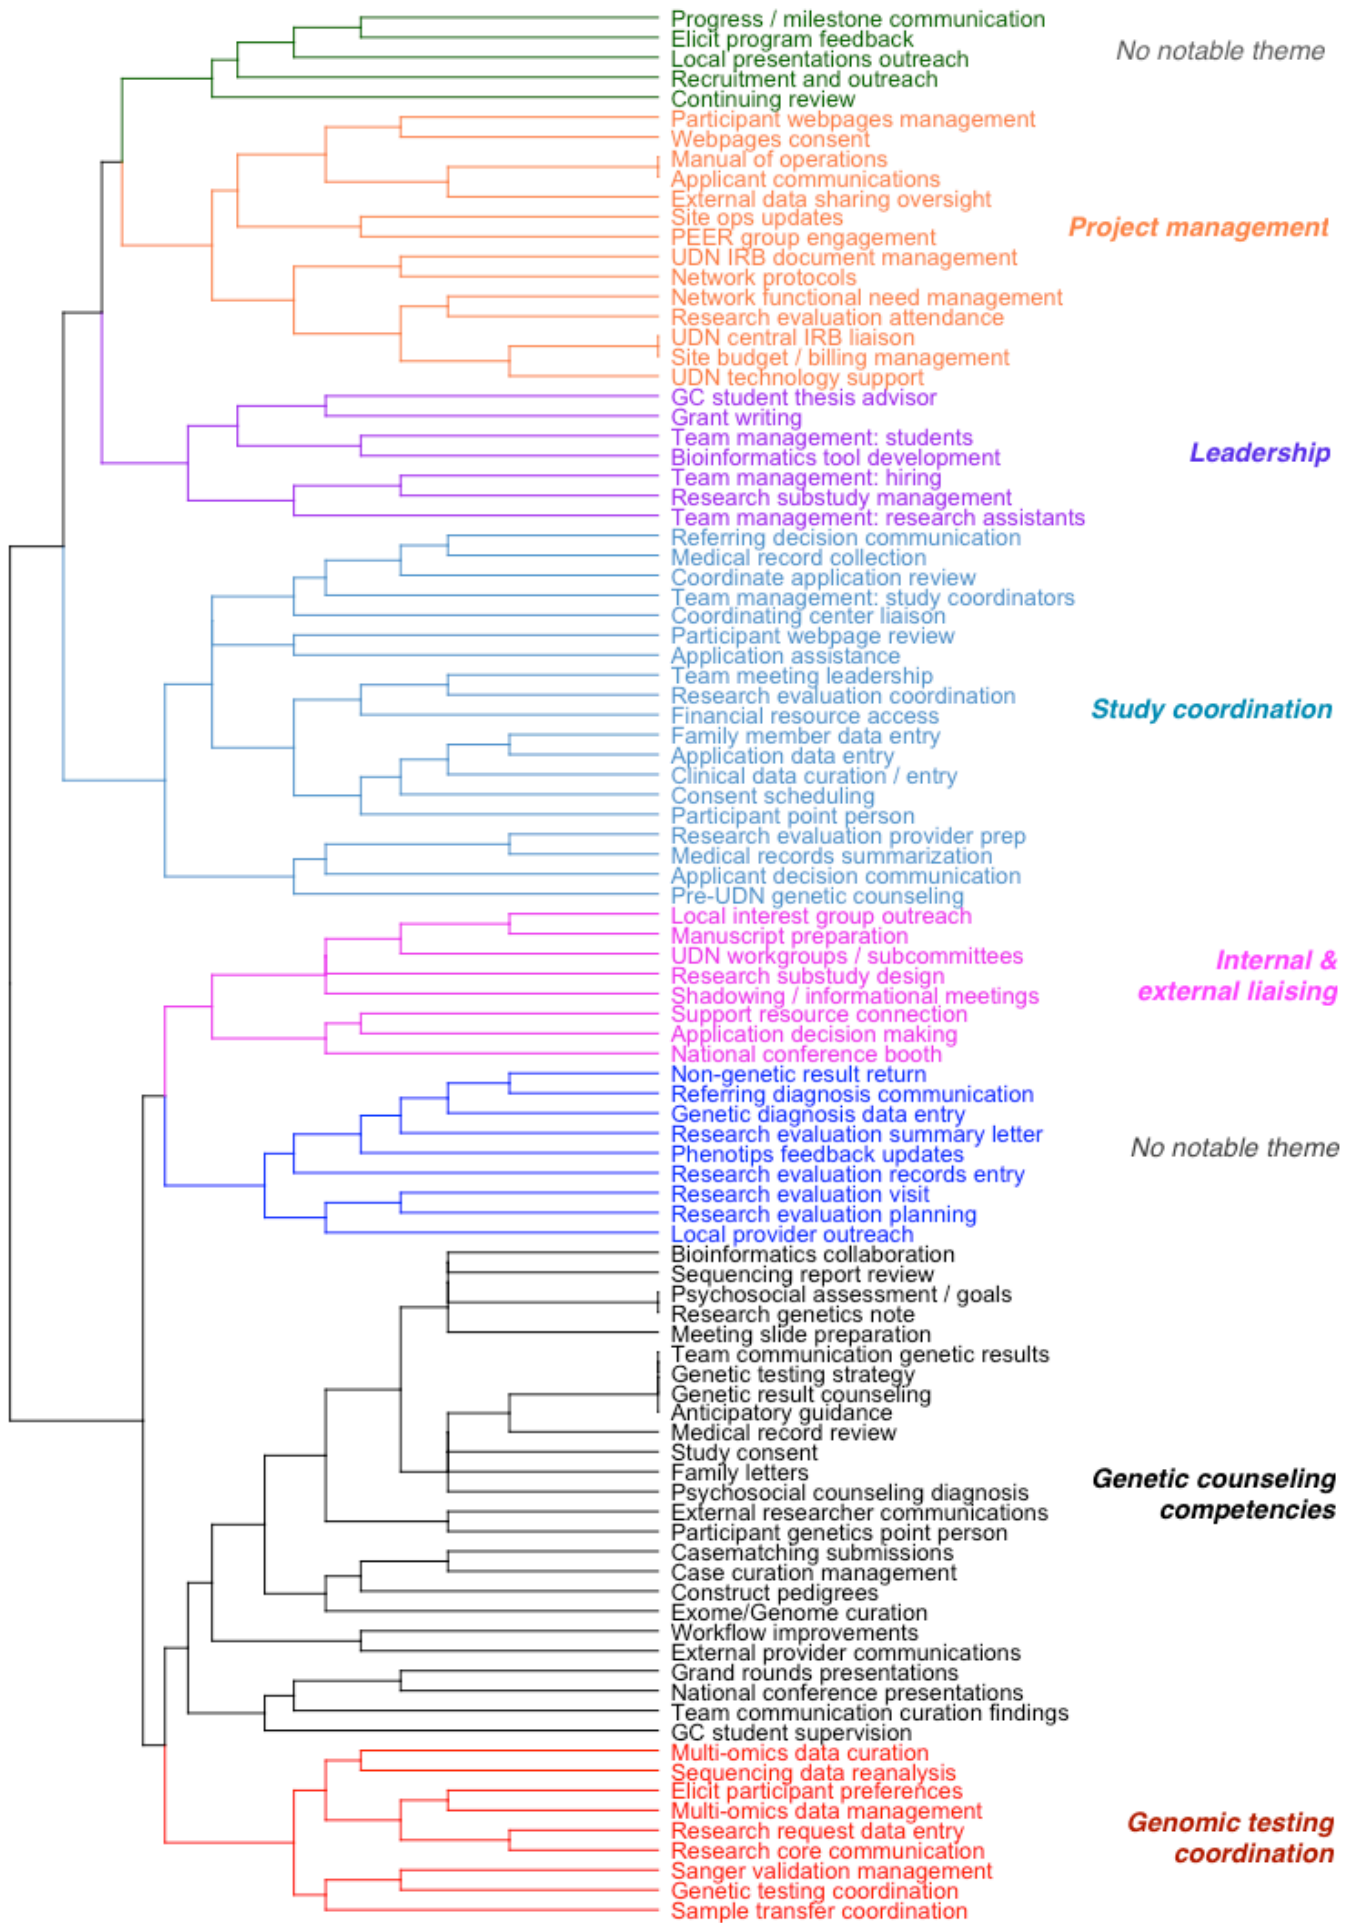

## Figure S1: Clustering by Role

Hierarchical clustering of genetic counselor roles. Roles often performed by the same genetic counselor are grouped. Colored boxes delineate individual clusters ( $k=8$ ). Labels corresponding to each branch are abbreviated versions of the corresponding role ( $n=96$ ); please see roles list table (in supplemental materials) for key. Themes identified are labeled on the right, color-coded by their relevant cluster ( $n=6$ ), or colored in grey if no notable theme was identified ( $n=2$ ).
