# Supplementary material
Source: PubMed Central journal article supplement (PMC11305122)
Supplement: NIHMS2011421-supplement-Supplemental_Info_1.pdf [file NIHMS2011421-supplement-Supplemental_Info_1.pdf]

## Defining GC Roles in the UDN – Survey Round 1

Purpose: Characterize the diverse roles of board-eligible/board-certified (BE/BC) genetic counselors working in the UDN during phase I.

This is the first of two rounds of this survey. The first round aims to qualitatively elicit genetic counselors' roles in the UDN. The second round aims to quantitatively describe these roles using a survey informed by round one. Additionally, there will be open-ended questions to supplement the data collected in both rounds.

### Survey Round 1:

1. Please fill in the following information:
  - a. Name:
  - b. UDN Site:
  - c. Length of time spent working with the UDN (round to nearest month):
  - d. Percent of time allocated to UDN-related work:
  
2. Please fill in the table below:

| Please describe up to 5 skills-based roles you consistently perform in each of the following domains: |                                                                   |                                                     |                                                                                       |                                                                                    |                                                                                                                       |                                                                                             |
|-------------------------------------------------------------------------------------------------------|-------------------------------------------------------------------|-----------------------------------------------------|---------------------------------------------------------------------------------------|------------------------------------------------------------------------------------|-----------------------------------------------------------------------------------------------------------------------|---------------------------------------------------------------------------------------------|
| Recruitment/<br>Application review:                                                                   | Acceptance / Consent:                                             | In-person Visit:                                    | Genetic Test/ Analysis:                                                               | Omics etc. Research &<br>Analysis:                                                 | Return of Results/<br>Closeout:                                                                                       | Psychosocial<br>Assessment/<br>Counseling:                                                  |
| <i>(ex: collecting &amp; reviewing medical records, application review committee)</i>                 | <i>(ex: sending acceptance letters, participating in consent)</i> | <i>(ex: scheduling, communicating w/ providers)</i> | <i>(ex: manage genetic testing strategy, variant curation &amp; interpretation)..</i> | <i>(ex: coordinating functional analyses, reviewing RNAseq/ metabolomics data)</i> | <i>(ex: writing closeout note, communicating with referring team, returning genetic test results to participants)</i> | <i>(ex: In-person psychosocial assessment, supportive counseling, connect w/ resources)</i> |

Date

| Communication with Patients:                                           | Communication with External Providers / Researchers:                  | Dissemination of Knowledge (conferences, papers)                   | Communication with UDN / Gateway                                  | Program Development                                                            | Professional Development / Supervision             | Other: |
|------------------------------------------------------------------------|-----------------------------------------------------------------------|--------------------------------------------------------------------|-------------------------------------------------------------------|--------------------------------------------------------------------------------|----------------------------------------------------|--------|
| <i>(ex: sending updates, coordinating family member participation)</i> | <i>(ex: communicating/ collaborating with experts on X condition)</i> | <i>(ex: writing case report, presenting at local grand rounds)</i> | <i>(ex: sending site ops updates, entering data to PhenoTips)</i> | <i>(ex: improving testing workflows, eliciting feedback from participants)</i> | <i>(ex: student supervision, peer supervision)</i> |        |

3. Please add any additional comments here:

a.
