# Supplementary material
Source: PubMed Central journal article supplement (PMC11305122)
Supplement: NIHMS2011421-supplement-Supplemental_Info_2.pdf [file NIHMS2011421-supplement-Supplemental_Info_2.pdf]

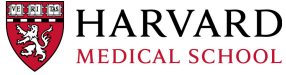

Please select the role(s) you perform in your current position as a genetic counselor in the UDN.

#### Recruitment/application review

|                                                                                                                                               |                          |
|-----------------------------------------------------------------------------------------------------------------------------------------------|--------------------------|
| Assist applicants/referring providers in applying                                                                                             | <input type="checkbox"/> |
| Coordinate collection and organization of medical records and/or additional information from applicants                                       | <input type="checkbox"/> |
| Elicit and construct family histories                                                                                                         | <input type="checkbox"/> |
| Review and summarize applicant medical records and/or prior genetic test results                                                              | <input type="checkbox"/> |
| Oversee/manage applicant list, physician assignment, and local application review meetings.                                                   | <input type="checkbox"/> |
| Oversee/participate in Coordinating Center communications with [prospective] applicants                                                       | <input type="checkbox"/> |
| Participate in case review committee (local and UDN-wide) [e.g. presenting, making recommendations for acceptance and/or evaluation strategy] | <input type="checkbox"/> |
| Process applications (data entry) and/or submit accepted cases to Gateway for Case Review Meeting                                             | <input type="checkbox"/> |
| Provide clinical genetic counseling and/or referral letter for [prospective] applicants                                                       | <input type="checkbox"/> |
| Oversee/participate in recruitment and outreach activities                                                                                    | <input type="checkbox"/> |

#### Acceptance/consent

|                                                                                                                                                          |                          |
|----------------------------------------------------------------------------------------------------------------------------------------------------------|--------------------------|
| Communicate acceptance decision to applicants (i.e. composing, sending Accept/Do not accept letters with or without recommendations from review meeting) | <input type="checkbox"/> |
| Communicate acceptance decision to referring providers                                                                                                   | <input type="checkbox"/> |
| Discuss genetic testing portion of the UDN consent with participants                                                                                     | <input type="checkbox"/> |
| Discuss entire UDN consent with participants                                                                                                             | <input type="checkbox"/> |
| Oversee participant webpages consent                                                                                                                     | <input type="checkbox"/> |
| Schedule in-person or remote consent discussions with probands and family members                                                                        | <input type="checkbox"/> |

#### In-person visit

### in person visit

|                                                                                                                                            |                          |
|--------------------------------------------------------------------------------------------------------------------------------------------|--------------------------|
| Participate in development of clinical evaluation plan (e.g. specialist evaluations, clinical tests, etc).                                 | <input type="checkbox"/> |
| Coordinate the logistics and scheduling for the in-person visit and communicate them to the participant/family members                     | <input type="checkbox"/> |
| Act as participant advocate by accompanying them through most parts of their in-person visit                                               | <input type="checkbox"/> |
| Prepare medical history and prior testing summaries for in-person clinical evaluations                                                     | <input type="checkbox"/> |
| Communicate with providers before visit to give them overview of process, to discuss candidate genes, and/or solicit summaries for wrap-up | <input type="checkbox"/> |
| Compose some or all of wrap-up document to be shared with participant and family                                                           | <input type="checkbox"/> |
| Meet with participants at the wrap-up meeting                                                                                              | <input type="checkbox"/> |

### Genetic test/analysis

|                                                                                                                                                         |                          |
|---------------------------------------------------------------------------------------------------------------------------------------------------------|--------------------------|
| Manage genetic testing strategy (e.g. WES vs. WGS, family members to include, etc.), discuss with clinical team                                         | <input type="checkbox"/> |
| Coordinate some or all of genetic testing for participants and family members (blood draws, sequencing requests in Gateway, billing for sendouts, etc.) | <input type="checkbox"/> |
| Assist in curation and interpretation of raw WES/WGS data                                                                                               | <input type="checkbox"/> |
| Review sequencing report variants (+/- research variants) and assess clinical relevance                                                                 | <input type="checkbox"/> |
| Communicate genetic results to clinical team, formulate recommendations for follow-up                                                                   | <input type="checkbox"/> |
| Track progress of each participant through curation pipeline and update clinical team weekly                                                            | <input type="checkbox"/> |
| Communicate clinical and/or genetic information to bioinformatics team to improve analysis                                                              | <input type="checkbox"/> |
| Submit variants for Sanger validation, track results                                                                                                    | <input type="checkbox"/> |
| Coordinate non-UDN reanalysis of sequencing data                                                                                                        | <input type="checkbox"/> |

### Omics, etc. (research and analysis)

|                                                                                                                    |                          |
|--------------------------------------------------------------------------------------------------------------------|--------------------------|
| Manage sendout, progress, and receipt of '-omics' data (RNA, metabolomics, functional studies, etc.)               | <input type="checkbox"/> |
| Review and integrate results of '-omics' data (RNA, metabolomics, functional studies, etc.)                        | <input type="checkbox"/> |
| Lead or participate in curation meetings to discuss updates, plans, and findings from genetic and research studies | <input type="checkbox"/> |
| Initiate participant webpages and track/respond to feedback                                                        | <input type="checkbox"/> |

- Work with bioinformaticians and data scientists to develop variant interpretation pipelines and curation tools
- Study design, data collection/analysis of site- and network-wide studies
- Enter candidate genes and/or clinical info into case matching databases (e.g. GeneMatcher, KOMP, etc.)
- Manage communication with research cores

#### Return of results/closeout

- Communicate diagnoses to referring providers for transition of care
- Return genetic results to participants, provide counseling around diagnosis (if appropriate)
- Document genetic diagnoses in Gateway and other relevant databases for network sharing
- Write family letter to explain new diagnosis and how to be tested for familial variants if desired/available
- Return clinical test results to participants (e.g. biochemical, other lab)
- Compose GC consult and/or clinical genetics note, input into to participant's medical record

#### Genetic counseling/psychosocial

- Assist in obtaining appropriate logistical or financial resources (e.g. letter of medical necessity, NORD funds)
- Identify and/or connect with appropriate support resources (e.g. SWAN, local support groups, diagnosis-specific social media groups) when desired
- Elicit narrative, participant/family member goals, perform psychosocial assessment, and provide supportive counseling where appropriate
- Provide anticipatory guidance regarding research process and participants' specific goals
- Provide psychosocial counseling around diagnoses/results and their implications

#### Communication with participants

- Act as main point of contact for participants, families, and/or their advocates regarding all study-related communication
- Elicit participants' preferences for data sharing post-diagnosis (e.g. inclusion in manuscripts, collaborating with external researchers, etc.)
- Act as "genetics" point of contact for participant/advocate questions, updates, and needs
- Participate in or manage PEER group

## Communication with external providers

- Communicate pertinent clinical and/or research information to external providers
- Manage communications with or inquiries by external experts and researchers regarding candidate diagnoses and/or genes of interest
- Facilitate transfer of participant samples to outside researchers (e.g. MTAs, shipping logistics, etc.)
- Educate local providers on how to refer participants to UDN, our process, etc.

## Dissemination of knowledge

- Coordinate local grand rounds/hospital presentations
- Participate in writing/reviewing manuscripts from UDN team
- Staff UDN booth at national conferences
- Present poster and/or platform talks at national conferences
- Present cases at local/network grand rounds or other meetings
- Prepare case slides for presentation at internal or external meetings
- Oversee external data sharing
- Give informational presentations to various groups about the UDN (internal research groups, GC groups, student interest groups, etc.)

## Communication with network/Gateway

- Act as main contact for UDN CC team & Gateway notifications – distribute to relevant team members
- Extract pertinent clinical data and enter it into Gateway / PhenoTips
- Enter appropriate genetic & research requests (Sequencing, MOSC, Metabolomics) into Gateway
- Enter relatives into Gateway and define whether affected or unaffected
- Coordinate and return monthly site-ops updates, diagnosis updates
- Participate in UDN working groups/subcommittees
- Manage Phenotips feedback from CC and update with new clinical information as needed

- Manage UDN technology support operations
- Supervise gathering, documentation, and organization of functional and technical requirements across UDN sites
- Upload records and wrap up letters into Gateway as needed
- Review participant webpages

### Program development

- Review and implement improvements to team workflow & research processes
- Assist in continuing review
- Elicit feedback from participants/collaborators/local team
- Monitor & communicate with UDN members progress and milestone progression
- Participate in development and implementation of site-specific or network studies
- Create, develop, and revise Network protocols, including central Institutional Review Board (IRB), research, and clinical protocols
- Manage local site and/or network Manual of Operations
- Coordinate student volunteers/work-study help
- Participate in interviewing/hiring of project personnel
- Lead or participate in grant writing/preparation

### Professional development/supervision

- Supervise research assistants and/or interns
- Genetic counseling student supervision
- Participate in informational meetings/shadowing opportunities for prospective GC students or researchers
- Participate in greater GC community locally
- Supervise team of study coordinators who schedule and coordinate participants' visits
- Participate in professional supervision group
- Genetic counseling student thesis advisor

Miscellaneous

Perform "duties as required"

Lead biweekly clinical evaluation team (CET) meetings

Lead weekly curation team meetings

Manage billing needs and/or site budget

Serve as central IRB liaison

Manage IRB/regulatory documents related to the study

Manage social media content relevant to UDN and local-site projects

Name

Please select your UDN site

Baylor clinical site

Duke clinical site

Harvard clinical site

NIH UDP clinical site

Stanford clinical site

UCLA clinical site

Vanderbilt clinical site

Coordinating Center

Baylor sequencing core

How long have you worked with the UDN, in months?

What percentage of your time is allocated to the UDN as defined by your salary?

What percentage of your time is allocated to the UDN in practice?

In a given month, what 5 things (ranked) do you spent the most time on?

Which roles do you get the most fulfillment out of? Please select roles from above survey options.

Comments
